# Supplementary material for: Interactions between genetics and environment shape Camelina seed oil composition
Source: PubMed Central journal article supplement (PMC7490867; doi:10.1186/s12870-020-02641-8), 2020-09-14
Supplement: 12870_2020_2641_MOESM4_ESM.pdf [file 12870_2020_2641_MOESM4_ESM.pdf]

K = 1

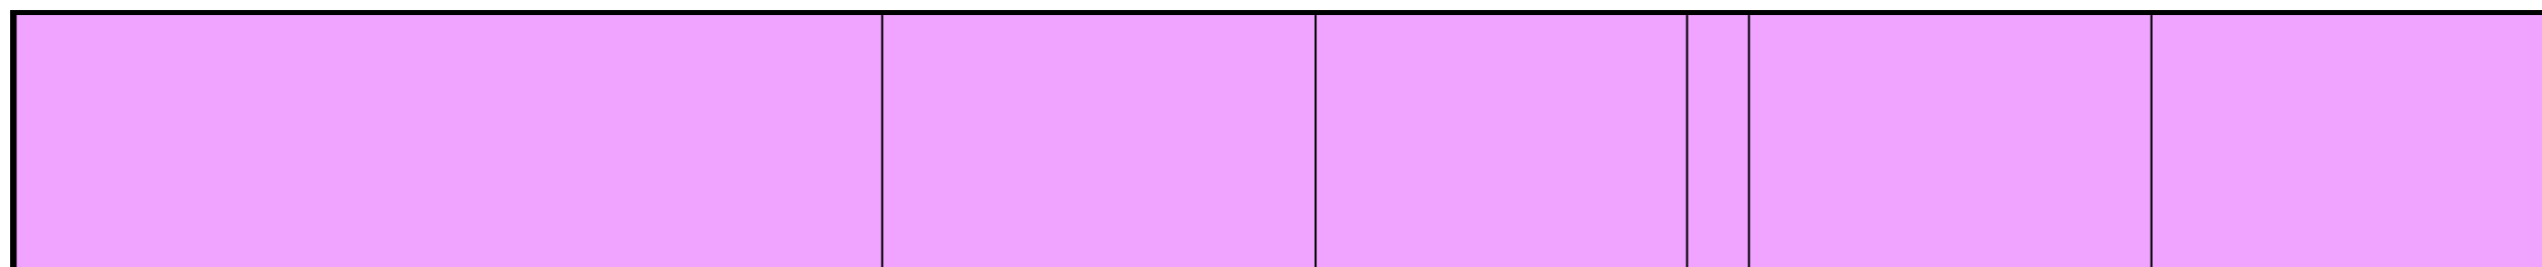

K = 2

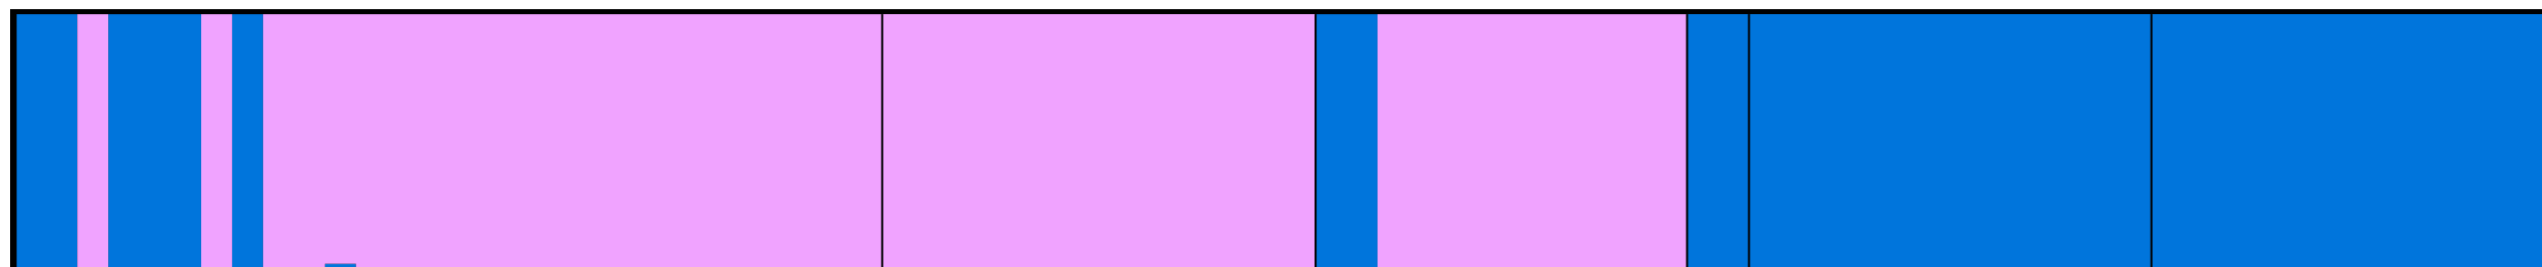

K = 3

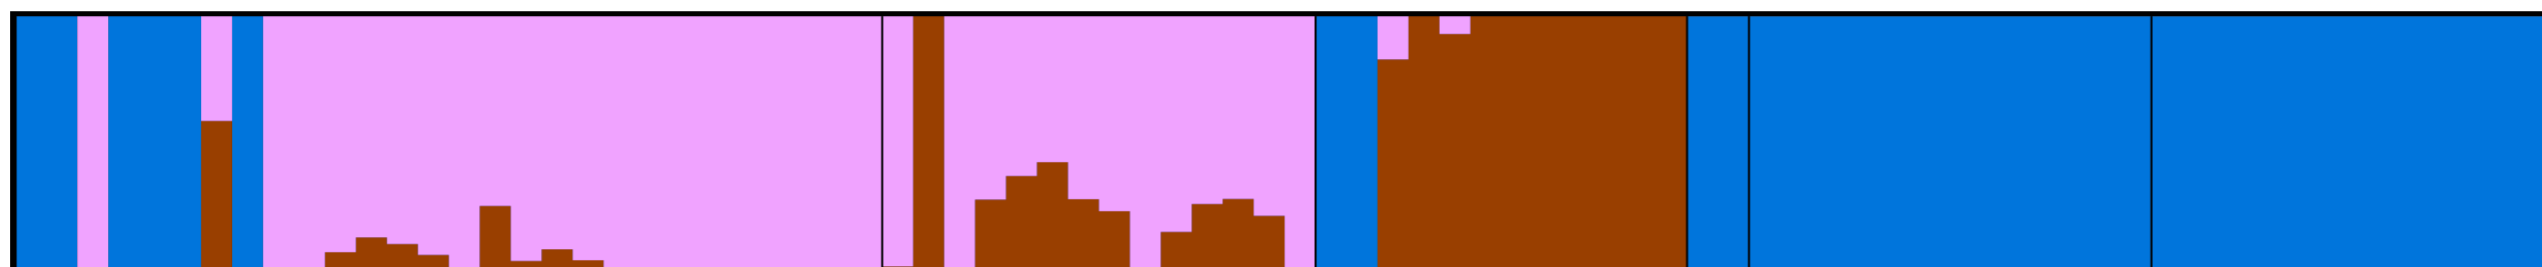

K = 4

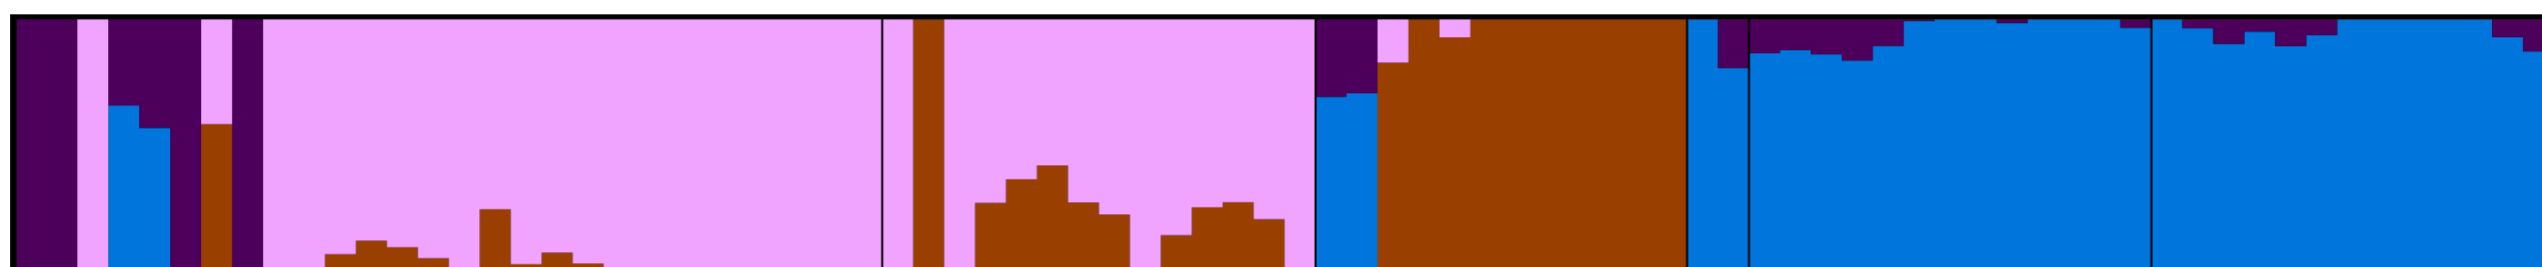

K = 5

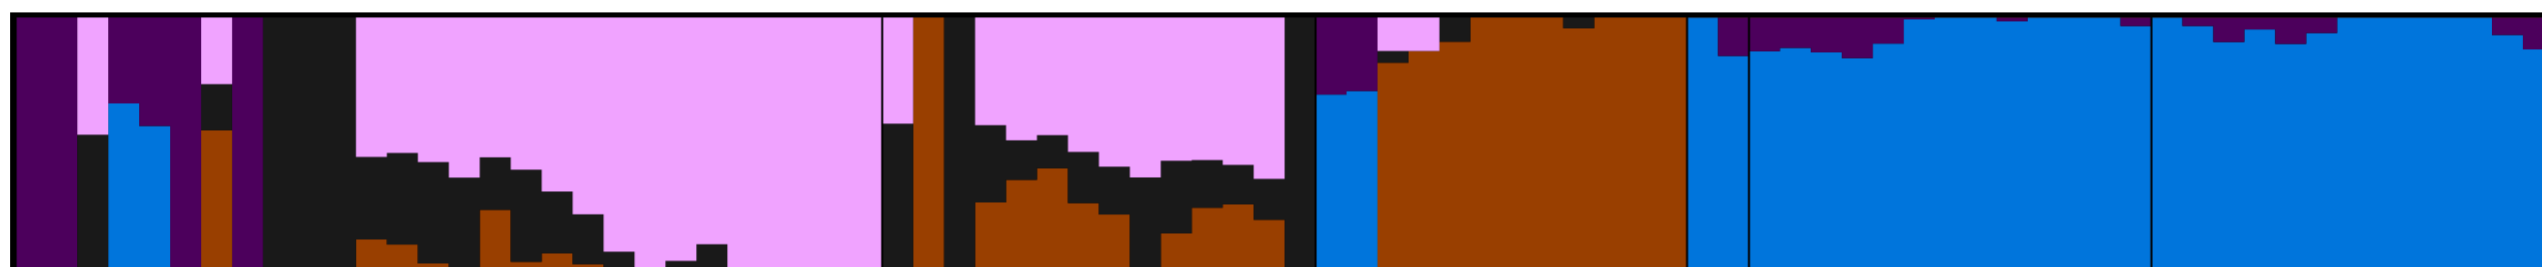

K = 6

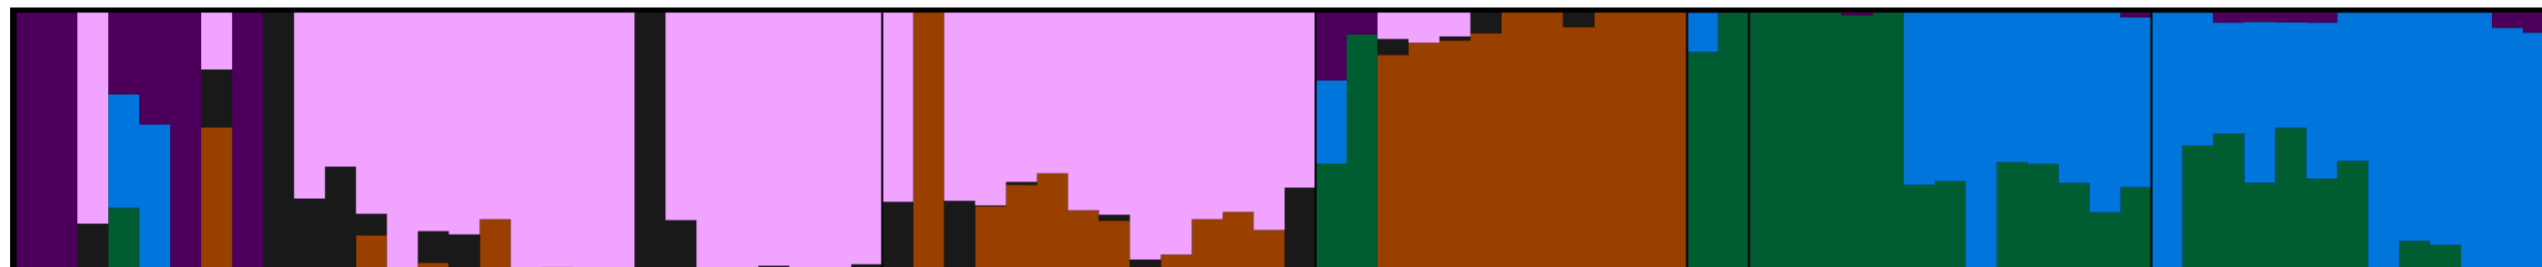

K = 7

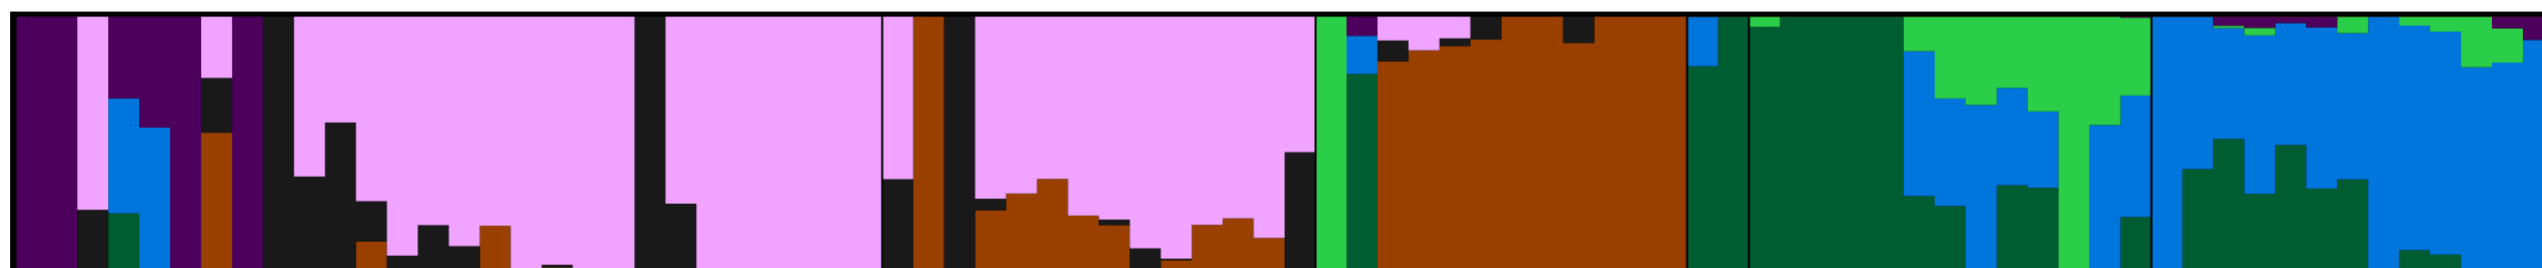

K = 8

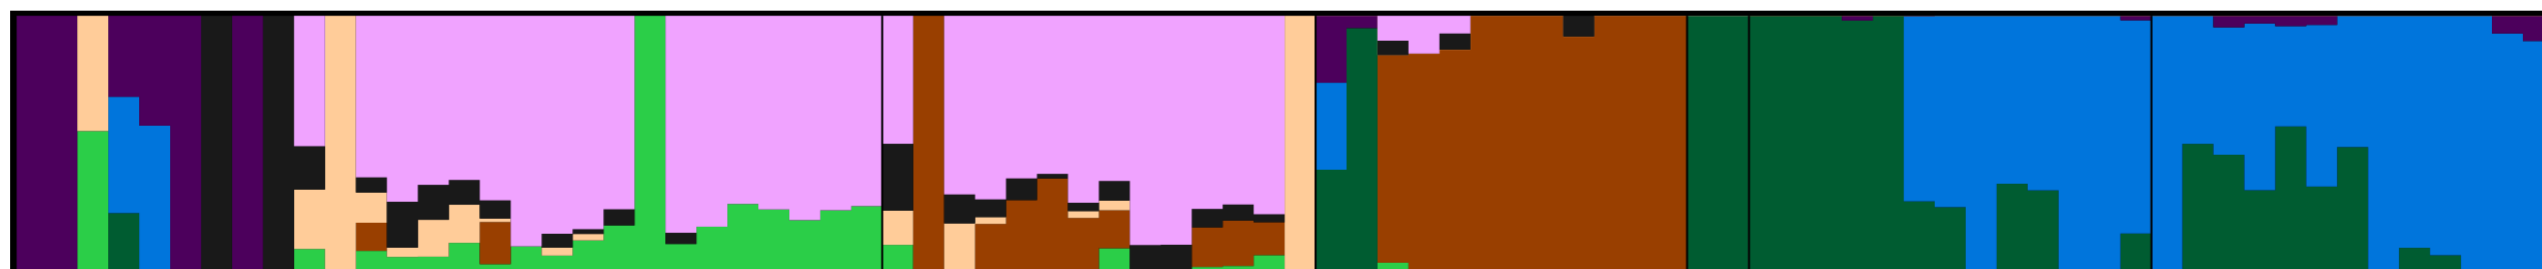

K = 9

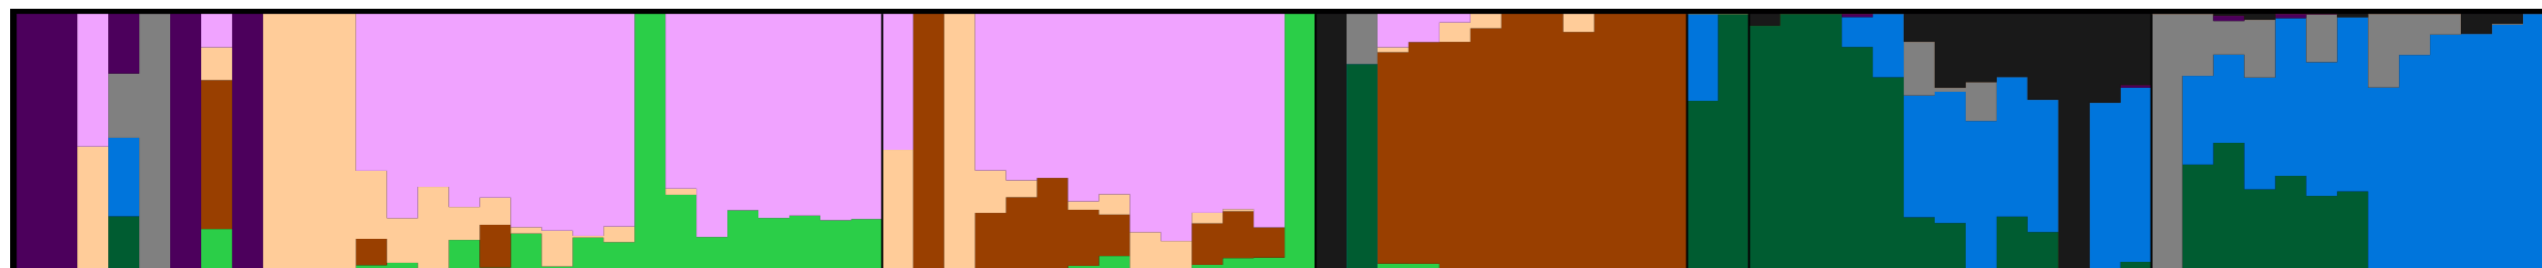

K = 10

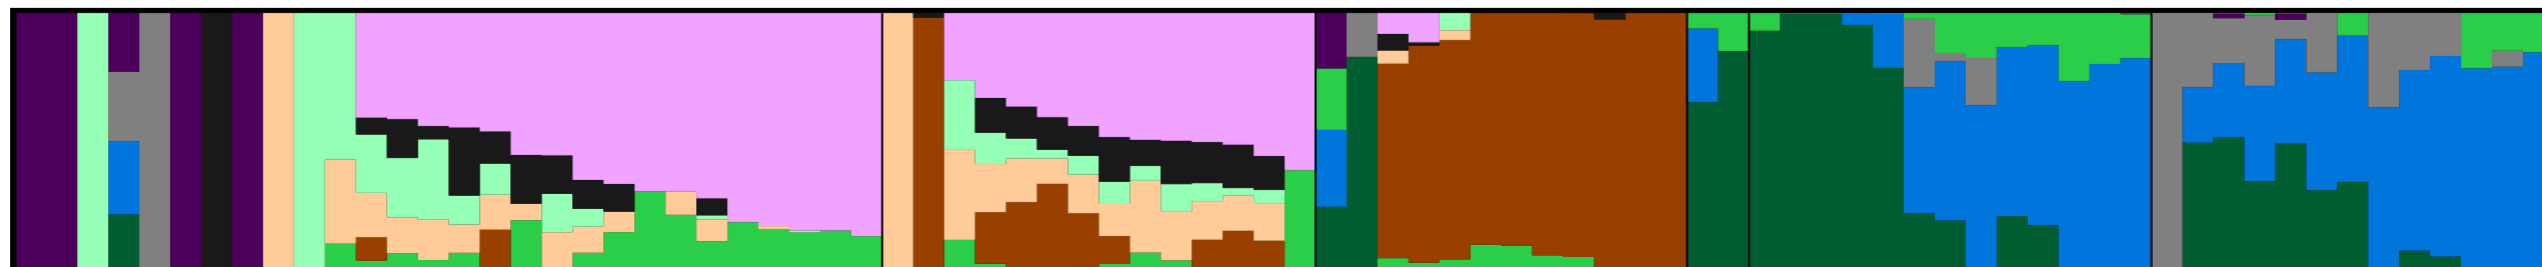

United States

N. Ukraine

S. Ukraine

Turkey

Armenia

Georgia
