# Supplementary material for: Interactions between genetics and environment shape Camelina seed oil composition
Source: PubMed Central journal article supplement (PMC7490867; doi:10.1186/s12870-020-02641-8), 2020-09-14

*C. microcarpa*

- Caucasus
- N. Ukraine
- S. Ukraine

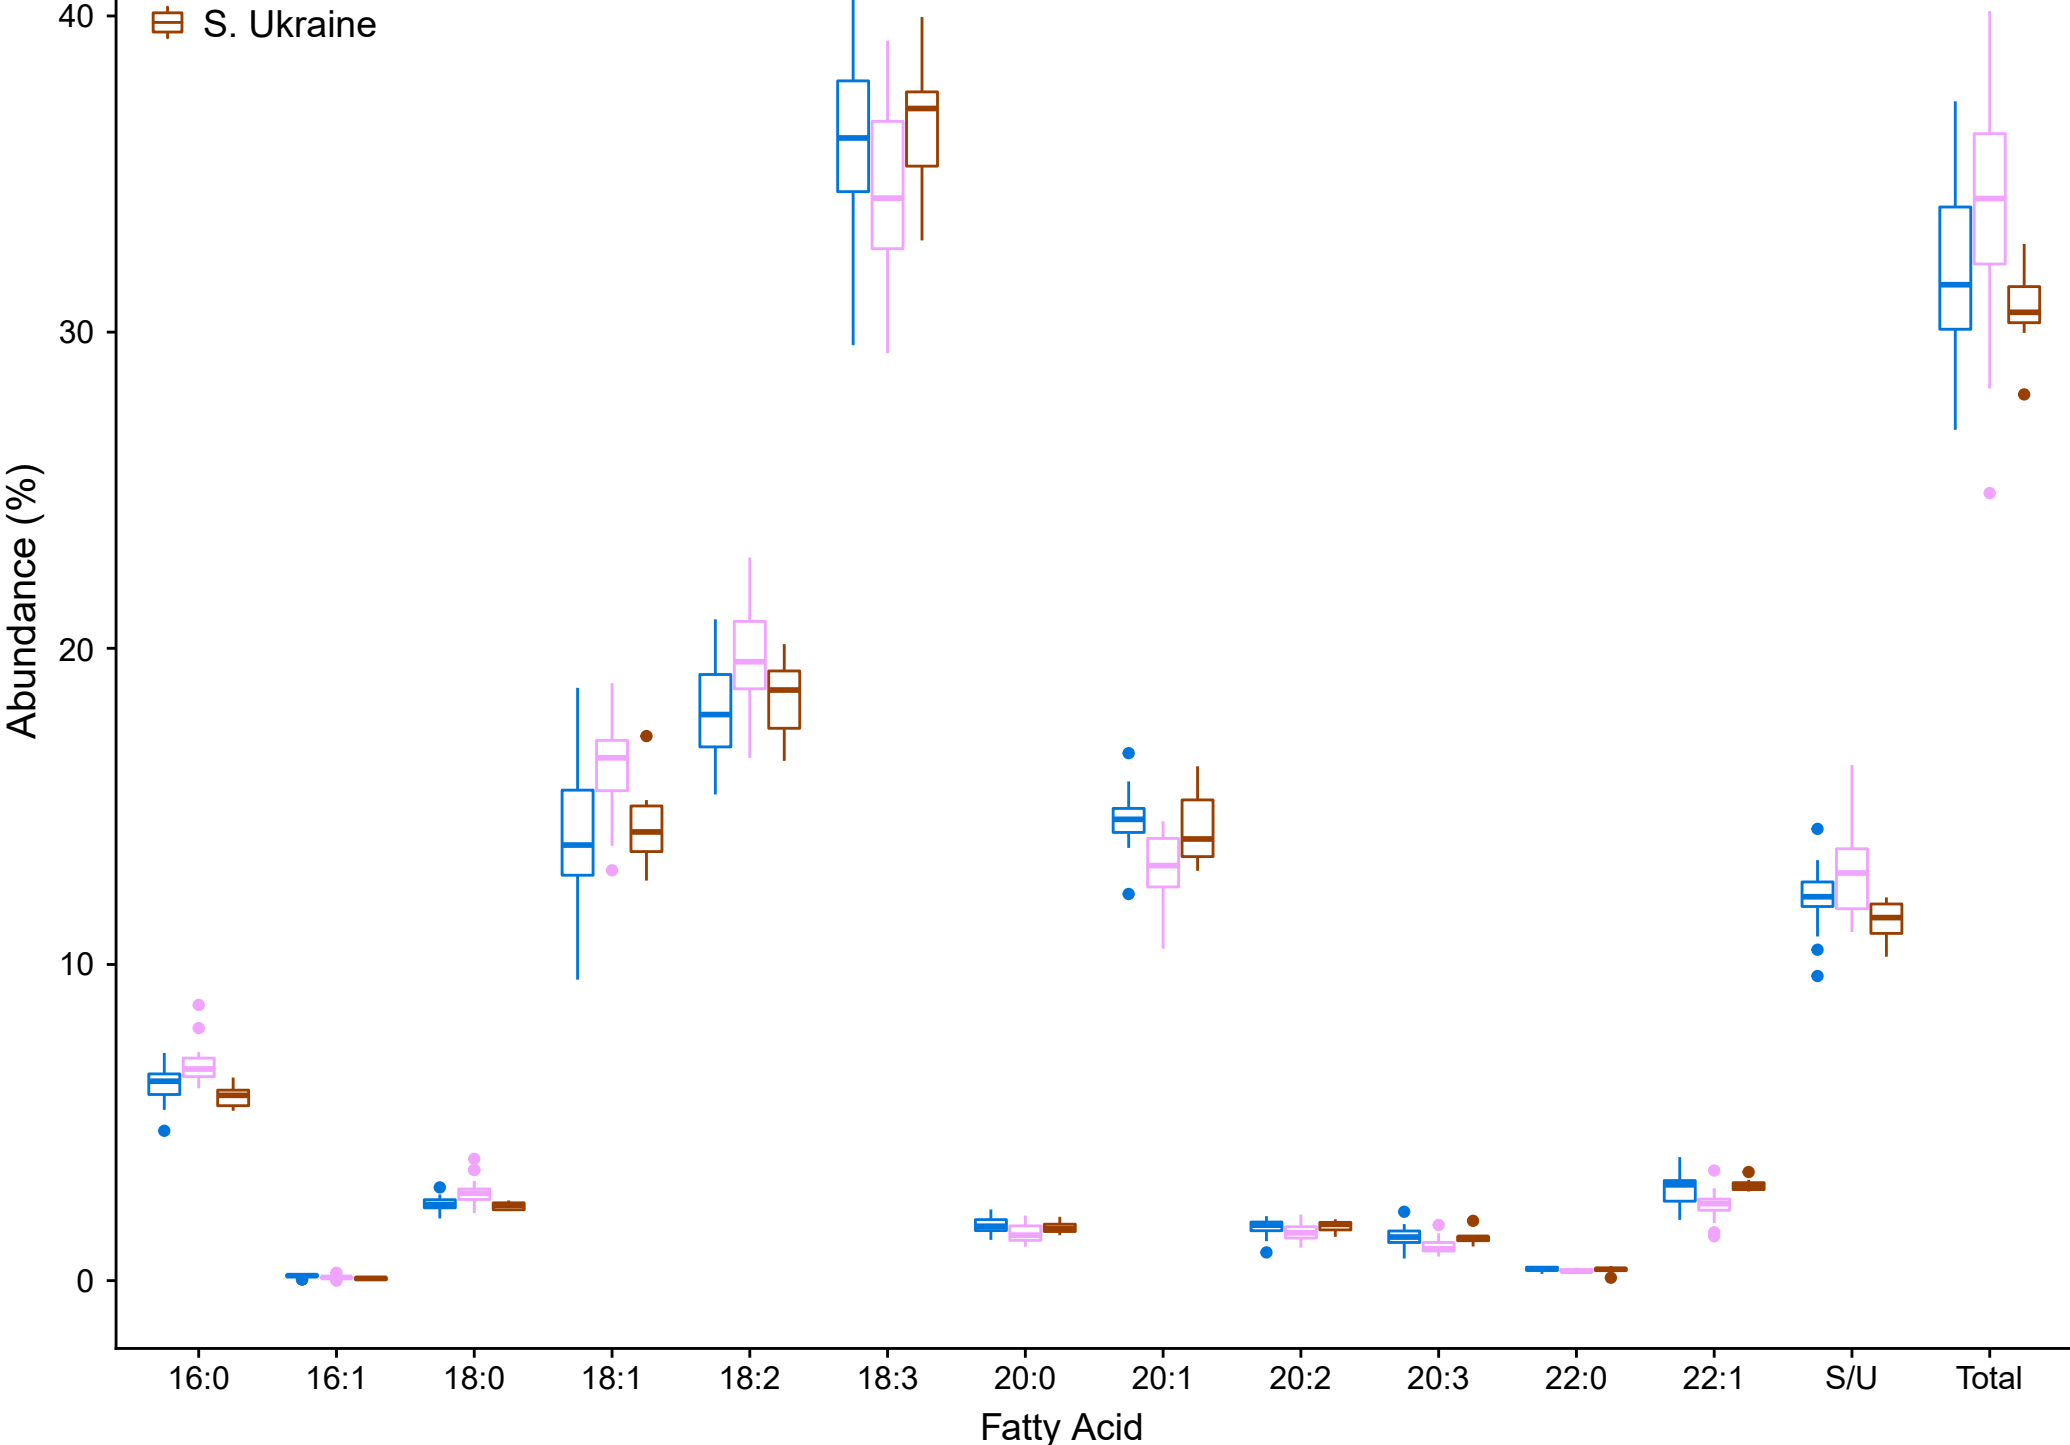

Supplement: 12870_2020_2641_MOESM7_ESM.pdf [file 12870_2020_2641_MOESM7_ESM.pdf]
